# Supplementary material
Source: PubMed Central journal article supplement (PMC5555835)

# Suppl. Fig. 14

A.

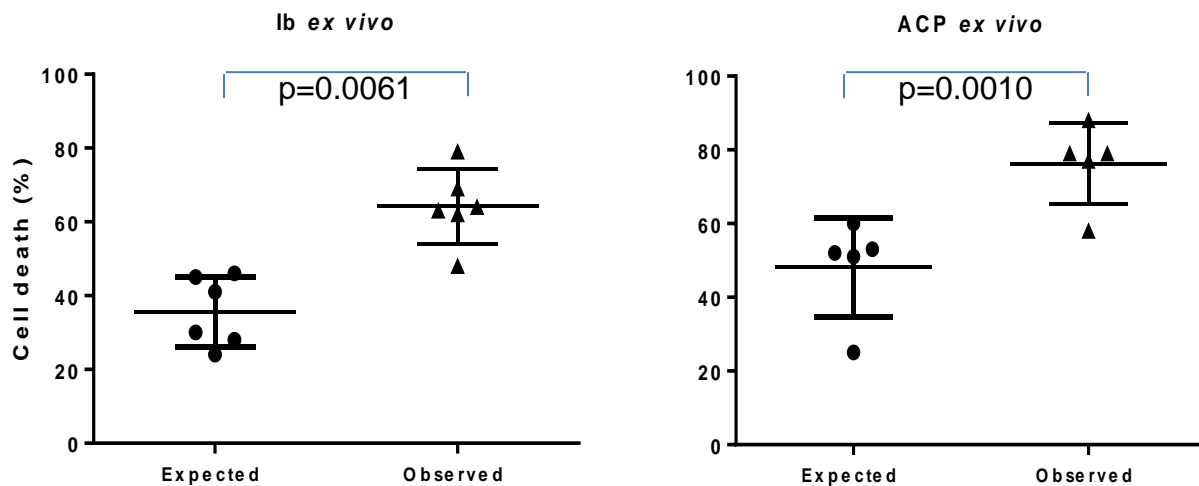

B.

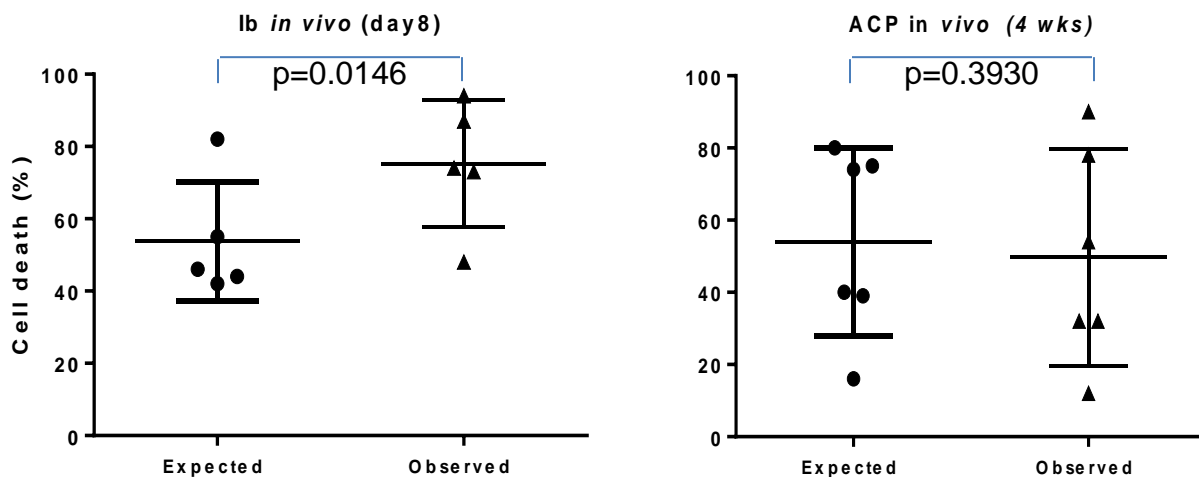

Supplement: NIHMS843852-supplement-20.pdf [file NIHMS843852-supplement-20.pdf]
